# Supplementary material
Source: publisher site journal article supplement (https://www.dovepress.com/article/247130)
Supplement: Supplementary file 1 [file get_supplementary_file.php]

**Supplement Data**

**Detection of cell-dissociated non-typeable Haemophilus influenzae in the airways of patients with chronic obstructive pulmonary disease.**

***Running title: NTHi, infection and COPD***

Samantha J Thulborn1, 2, Alessandro Ceroni3, Koirobi Haldar4,Vijay Mistry4, Jennifer L Cane1, 2, Christopher E Brightling4, Michael R Barer4, Mona Bafadhel1

1Respiratory Medicine Unit, Nuffield Department of Medicine, University of Oxford, Oxford, UK

2Oxford NIHR Biomedical Research Centre, University of Oxford, UK

3Target Discovery Institute, Nuffield Department of Medicine, University of Oxford, Oxford, UK

4Department of Immunity, Infection & Inflammation, University of Leicester, Leicester, UK

5Institute for Lung Health, University of Leicester, Leicester, UK

Correspondence to: Dr Mona Bafadhel, Senior Lecturer Respiratory Medicine, Respiratory Medicine Unit, NDM Research Building, Old Campus Road, University of Oxford, Oxford, OX3 7FZ, UK

E-mail: [mona.bafadhel@ndm.ox.ac.uk](mailto:mona.bafadhel@ndm.ox.ac.uk)

Tel: +44 1865 612898

**Abbreviations List**

DNA Deoxyribonucleic Acid

DTT Dithiothreitol

E Coli *Escherichia coli*

OMP Outer Membrane Protein

PBS Phosphate-Buffered Saline

PCR Polymerase Chain Reaction

qPCR Quantitative Polymerase Chain Reaction.

**Supplement Methods**

*Plasmid formation for standards*

A *Haemophilius influenzae* strain (National Collection of Type Culture 11931) was acquired from the John Radcliffe Hospital Microbiology Laboratory. The *H. influenzae* was grown in supplemented brain heart infusion broth at 37°C with 4% CO2. Bacterial DNA was extracted as described above and the outer membrane protein (OMP) P6 gene (Accession Number M19391) was amplified by polymerase chain reaction (PCR) according to the following reaction mix: 32.5µL of DNA-free water, 10µL of 5X Phusion buffer (New England Biolabs Inc., Ipswich, Massachusetts), 1µL of 200µM nucleotide triphosphates containing [deoxyribose](http://en.wikipedia.org/wiki/Deoxyribose) (New England Biolabs Inc., Ipswich, Massachusetts), 0.25µL of 10µM forward and reverse primers (Sigma, Poole, Dorset) (Table S1), 5µL of 5M Betaine (Sigma, Poole, Dorset), 0.5µL of Phusion High-Fidelity DNA polymerases (New England Biolabs Inc., Ipswich, Massachusetts) and 0.5 µL of extracted *H. influenzae* DNA (DNA volume of 57.55ng/µL), giving a total volume of 50µl per reaction. The PCR reaction was performed as follows: initial denaturation of 2 min at 95°C, followed by 30 cycles of 1 minute at 95°C, 30 sec at 56°C, 30 sec at 72°C followed by 1 cycle at 72°C for 10 min.

Following amplification, 10µL of PCR product was analysed by agarose gel electrophoresis to verify the 700 base pairs insert had been amplified. The DNA was purified using a QIAquick PCR Purification kit (QIAGEN Ltd, Venlo, Netherlands) according to manufacturer’s protocol.

The truncated OMPP6 insert, (Sequence: NC_003902.1) was ligated into a positive selection cloning vector pJET1.2/blunt, using a CloneJET PCR Cloning kit (Thermo Fisher Scientific Inc, Waltham, Massachusetts) according to manufacturer’s protocol. The vector containing OMPP6 was transformed into a versatile strain of chemically competent cells (Subcloning Efficiency DH5α Competent cells, Thermo Fisher Scientific Inc, Waltham, Massachusetts) following standard protocols and recombinant Escherichia Coli was cultured on to a LB agar plate at 37°C with the addition 100µg/mL of ampicillin (Sigma, Poole, Dorset). The next day several colonies were picked and individually tested for the presence of the insert of interest. Single colonies were grown in LB media with the addition of ampicillin and grown for 16 hours at 37°C. QIAprep Miniprep (QIAGEN Ltd, Venlo, Netherlands) was then preformed on the plasmid. Gel electrophoresis was conducted by use of standard agarose gel protocol to ensure the plasmid of 2974 base pairs (bp) and an insert of 700bp were present. The plasmid was serially diluted and used as standards for qPCR, giving a known concentration of the *H. influenzae* OMP P6 gene to compare to the unknown samples. The standard concentration ranged from 5 x 10-8 to 5 x 10-2ng/µL, as measured on Nano-drop 2000 (Thermo Fisher Scientific Inc, Waltham, Massachusetts).

*Isolation of bacterial DNA*

DNA was extracted from 200µL of sputum cell-free dithiothreitol (DTT) (Sigma, Poole, Dorset) supernatant using a DNeasy Blood and Tissue kit (QIAGEN Ltd, Hilden Germany) according to the manufacturer’s gram-negative bacteria protocol. The elution was then measured on the nano-drop to ensure the presence of DNA. All samples were stored at -20°C until further qPCR analysis.

*Real-time PCR of samples*

A TaqMan based qPCR approach was used. Primers (Sigma, Poole, Dorset) (Table S1) previously determined to be sensitive and specific for the identification of *H. influenzae* in respiratory secretions1 were used to target the OMP P6 gene. For detection a JOE –labelled probe with a black hole quencher was designed (Sigma, Poole, Dorset). The optimised qPCR was performed in 20µL reaction containing 10µL of 2x LuminoCt qPCR ReadyMix (SIGMA), 3.8µL of PCR grade water, 0.4µL of 10µM stock of each primer and 0.4µL of the probe. A total of 5µL of target DNA was used in the assay, which was performed using a Roche LightCycler® 480 II. The qPCR was performed according to the following program: 5 min of enzyme activation at 95°C, followed by 40 cycles at 95°C for 15 sec and 60°C for 30 sec and finally a cooling step at 40°C for 1 min. All samples, negatives and qPCR standards were run in duplicate on each plate.

The Roche LightCycler® 480 II used the cycle threshold value of the standards of known *H.influenzae* concentration to calculate the concentration within our samples. Any samples that had a cycle threshold of ≥35 were considered negative and given a value of 1000 gene copies/ml for the remainder of the analysis for expression of parametric data. The number of gene copies of the standards was calculated as shown below:

Mean DNA concentration (ng/µL) * (6.022 x 1023) / Plasmid (bp) * 660x109

This equation used Avogadro’s number, which is based on the assumption that the average weight of a base pair is 660 Daltons 2.

Due to the dilution of the sputum plug with solutions to aid mucus break-up all positive samples were given a final gene copy number of plus times nine to take into account the processing method.

***Table S1. TaqMan probes and primers used to quantify H. influenzae.***

| **Prime/probe** | **Sequence** | **Target Gene** |
| --- | --- | --- |
| Plasmid formation forward cloning | 5’-TTCCAGCTTGGTCTCCATAC-3’ | OMP P6 |
| Plasmid formation reverse cloning | 5’-AATGGTAGGTTGTGAGAGGC-3’ | OMP P6 |
| Hi P6 F 3 (qPCR) | 5’-CCA GCT GCT AAA GTA TTA GTA GAA G-3’  (position 302-326) - 3 | OMP P6 |
| Hi P6 R 3 (qPCR) | 5’-TTC ACC GTA AGA TAC TGT GCC-3’ (position 477-457) | OMP P6 |
| Hi P6 Probe (qPCR) | 5’ –[JOE]ACA[+A]CG[+T]CG[+T]GC[+A]GATGC[BHQ1]- 3’ | OMP P6 |

References

1. Li B, Chen J-Q. Development of a sensitive and specific qPCR assay in conjunction with propidium monoazide for enhanced detection of live Salmonella spp. in food. *BMC Microbiology.* 2013;13(1):273.

2. Ritalahti KM, Amos BK, Sung Y, Wu Q, Koenigsberg SS, Löffler FE. Quantitative PCR Targeting 16S rRNA and Reductive Dehalogenase Genes Simultaneously Monitors Multiple Dehalococcoides Strains. *Applied and Environmental Microbiology.* 2006;72(4):2765-2774.

3. Abdeldaim GM, Stralin K, Kirsebom LA, Olcen P, Blomberg J, Herrmann B. Detection of Haemophilus influenzae in respiratory secretions from pneumonia patients by quantitative real-time polymerase chain reaction. *Diagn Microbiol Infect Dis.* 2009;64(4):366-373.
